# Supplementary material
Source: MDPI journal article supplement (https://www.mdpi.com/2311-5637/8/10/565)
Supplement: s1 [file s1]

### Supplementary data S1: Energy Requirements Analysis for Micro-aerobic with thickening process

**Table S1.1:** General analysis including all the components required

|                  | Power (KW) | Working Hours (h) | Equipment working per day | Hours per year (h) | Energy requirement per year (MWh/year) |
|------------------|------------|-------------------|---------------------------|--------------------|----------------------------------------|
| Centrifuge       | 37*        | 3*                | 2*                        | 2190               | 81                                     |
| Immersion Heater | 6          | 24                | 4                         | 35040              | 210                                    |
| Feeding pumps    | 8*         | 3                 | 2                         | 2433               | 18                                     |
| Blower           | 12         | 24                | 4                         | 35040              | 405                                    |
| Boiler           | 4638       | 1                 | 1                         | 357                | 1655                                   |
|                  |            |                   |                           | Total (MW/year)    | 2370                                   |

\*: \* Data supplied by the Mapocho/Trebal WWTP

**Table S1.2:** Energy requirement of Boiler

| Component                                                    | Value      |
|--------------------------------------------------------------|------------|
| Sludge Mass (Kg)                                             | 150000     |
| Assuming $C_{p\text{sludge}} = C_{p\text{water}}$ (KJ/Kg*°C) | 4.2        |
| Temperature of the sludge before pre-treatment (°C)          | 22.0       |
| Temperature of the sludge after pre-treatment (°C)           | 35.0       |
| Heat requirement (KJ)                                        | 8162700    |
| Saturated steam enthalpy (12 Bar) (KJ/Kg)                    | 2783.0     |
| Steam requirement by each reactor (Kg)                       | 2933.05785 |
| Number of reactors working per day                           | 2.0        |
| Steam requirement by both lines (Kg)                         | 5866.1157  |
| Steam rated output by the boiler (Kg/h)*                     | 6000.0     |
| Boiler Power (KW)                                            | 4638.33333 |
| Total time (h)                                               | 0.97768595 |

\*: Data supplied by the Mapocho/Trebal WWTP

**Table S1.3:** Energy requirement of Blower

|                                         |      |
|-----------------------------------------|------|
| Airation (vvm)                          | 0.35 |
| Pre-treatment reactor (m <sup>3</sup> ) | 200  |
| Effective Volume (m <sup>3</sup> )      | 150  |
| Airation Rate (m <sup>3</sup> /h)       | 3150 |
| Blower* Power (kW)                      | 12   |

\*: Blower model: Repicky R 2.5, 3400 RPM ( $\Delta P=100$  mBar)

**Table S1.4:** Energy requirement of feeding pump

| Component                                      | Value      |
|------------------------------------------------|------------|
| Solid content of the sludge (g/L)              | 160        |
| Volume to pre-treat (m <sup>3</sup> )          | 300        |
| Reactor volume (m <sup>3</sup> )               | 200        |
| Reactor effective volume (m <sup>3</sup> )     | 150        |
| Capacity of feeding pumps (m <sup>3</sup> /h)* | 45         |
| Time to feed each reactor (h)                  | 3.33333333 |
| Number of reactors per line                    | 2          |
| Number of lines                                | 2          |
| Number of reactors                             | 4          |

\*: Data supplied by the Mapocho/Trebal WWTP

## Supplementary data S2: Energy Requirements Analysis for Micro-aerobic without thickening process

**Table S2.1:** General analysis including all the components required

|                  | Power (KW) | Working Hours (h) | Equipment working per day | Hours per year (h)     | Energy requirement per year (MWh/year) |
|------------------|------------|-------------------|---------------------------|------------------------|----------------------------------------|
| Immersion Heater | 6          | 24                | 16                        | 140.160                | 841                                    |
| Feeding pumps    | 8*         | 3                 | 8                         | 9.733                  | 73                                     |
| Blower           | 12         | 24                | 16                        | 140.160                | 1.620                                  |
| Boiler           | 4638       | 4                 | 1                         | 1.427                  | 6.621                                  |
|                  |            |                   |                           | <b>Total (MW/year)</b> | 9.155                                  |

\*: \* Data supplied by the Mapocho/Trebal WWTP

**Table S2.2:** Energy requirement of Boiler

|                                                              | Value     |
|--------------------------------------------------------------|-----------|
| Sludge Mass (Kg)                                             | 150.000   |
| Assuming $C_{p\text{sludge}} = C_{p\text{water}}$ (KJ/Kg °C) | 4         |
| Temperature of the sludge before pre-treatment (°C)          | 22        |
| Temperature of the sludge after pre-treatment (°C)           | 35        |
| Heat requirement (KJ)                                        | 8.162.700 |
| Saturated steam enthalpy (12 Bar) (KJ/Kg)                    | 2.783     |
| Steam requirement by each reactor (Kg)                       | 2.933     |
| Number of reactors working per day                           | 8         |
| Steam requirement by both lines (Kg)                         | 23.464    |
| Steam rated output by the boiler (Kg/h)*                     | 6.000     |
| Boiler Power (KW)                                            | 4.638     |
| Total time (h)                                               | 4         |

\*: Data supplied by the Mapocho/Trebal WWTP

**Table S2.3:** Energy requirement of Blower

|                                         |       |
|-----------------------------------------|-------|
| Airation (VVM)                          | 0.35  |
| Pre-treatment reactor (m <sup>3</sup> ) | 200   |
| Effective Volume (m <sup>3</sup> )      | 150   |
| Airation Rate (m <sup>3</sup> /h)       | 3.150 |
| Blower* Power (kW)                      | 12    |

\*: Blower model: Repicky R 2.5, 3400 RPM ( $\Delta P=100$  mBar)

**Table S1.4:** Energy requirement of feeding pump

| Component                                      | Value      |
|------------------------------------------------|------------|
| Solid content of the sludge (g/L)              | 40         |
| Volume to pre-treat (m3)                       | 1.200      |
| Reactor volume (m3)                            | 200        |
| Reactor effective volume (m3)                  | 150        |
| Number of reactors per line                    | 8          |
| Number of lines                                | 2          |
| Number of reactors                             | 16         |
| Capacity of feeding pumps (m <sup>3</sup> /h)* | 45         |
| Time to feed each reactor                      | 3.33333333 |

\*: Data supplied by the Mapocho/Trebal WWTP

### Supplementary data S3: Energy Requirements Analysis for thermal pre-treatment

**Table S3.1:** General analysis including all the components required

|                     | Power (KW) | Working Hours (h) | Equipment working per day | Hours per year (h) | Energy requirement per year (MWh/year) |
|---------------------|------------|-------------------|---------------------------|--------------------|----------------------------------------|
| Centrifuge          | 37*        | 3.0*              | 2                         | 2.190              | 81                                     |
| Recirculation Pumps | 8*         | 10.2              | 2                         | 7.463              | 56                                     |
| Feeding pumps       | 8*         | 1.3               | 4                         | 1.830              | 14                                     |
| Boiler              | 4.638      | 4.0               | 1                         | 1.445              | 6.701                                  |
|                     |            |                   |                           | Total (MW/year)    | 6.852                                  |

\*: Data supplied by the Mapocho/Trebal WWTP

**Table S3.2:** Energy requirement of Boiler

|                                                            | Value     |
|------------------------------------------------------------|-----------|
| Temperature of the sludge in the pulper (°C)               | 95        |
| Temperature of the sludge in the reactor (°C)              | 165       |
| Assuming $C_{p\text{sludge}}=C_{p\text{water}}$ (KJ/Kg*°C) | 4         |
| Sludge Mass (Kg)                                           | 7.500     |
| Heat requirement (KJ)                                      | 2.197.650 |
| Saturated steam enthalpy (12 Bar) (KJ/Kg)                  | 2.783     |
| Steam requirement by each reactor (Kg)                     | 790       |
| Steam requirement In Line A (Kg)                           | 2.369     |
| Steam requirement in both lines (Kg)                       | 4.738     |
| Steam rated output by the boiler (Kg/h)                    | 6.000     |
| Boiler Rating (KW)                                         | 4.638     |
| Time in each cycle (h)                                     | 1         |
| Number of cycles needed                                    | 5         |
| Total time(h)                                              | 4         |
| Consumption of live steam in each line (kg/h)              | 599       |

\*: Data supplied by the Mapocho/Trebal WWTP

**Table S3.3:** Energy requirement of recirculation pump

|                                                          |    |
|----------------------------------------------------------|----|
| Fill Reactor with 7.5 m <sup>3</sup> (min)               | 15 |
| Inject Steam in the Reactor (min)                        | 47 |
| Hold temperature of reactor at 165°C (min)               | 30 |
| Release Steam to the pulper (min)*                       | 15 |
| Transfer sludge to flash tank by pressure release (min)* | 15 |
| Number of cycles needed                                  | 5  |
| Total time (h)                                           | 10 |
| Number of pumps per line                                 | 1  |
| Number of lines                                          | 2  |
| Total number of recirculation pumps                      | 2  |

\* Data supplied by the Mapocho/Trebal WWTP

**Table S3.4:** Energy requirement of feeding pump

| Components                                                             | Value |
|------------------------------------------------------------------------|-------|
| Solid content of the sludge (g/L)                                      | 160   |
| Volume of sludge to digestion each day (m <sup>3</sup> )               | 300   |
| Volume of sludge to digestion processed by each line (m <sup>3</sup> ) | 150   |
| Dilution Factor due steam addition (%)*                                | 33    |
| Volume of hydrolyzed undiluted sludge (m <sup>3</sup> )                | 113   |
| Reactor capacity (m <sup>3</sup> )                                     | 8     |
| Reactor in each line                                                   | 3     |
| Volume of sludge processed by one cycle (m <sup>3</sup> )              | 23    |
| Number of cycles                                                       | 5     |
| Capacity of feeding pumps (m <sup>3</sup> /h)*                         | 45    |
| Number of feeding pumps per line                                       | 2     |
| Number of lines                                                        | 2     |
| Total number of feeding pumps                                          | 4     |
| Feeding time per cycle (h)                                             | 0.3   |
| Feeding time (h)                                                       | 1     |

\*: Data supplied by the Mapocho/Trebal WWTP

**Supplementary data S4: Figures**

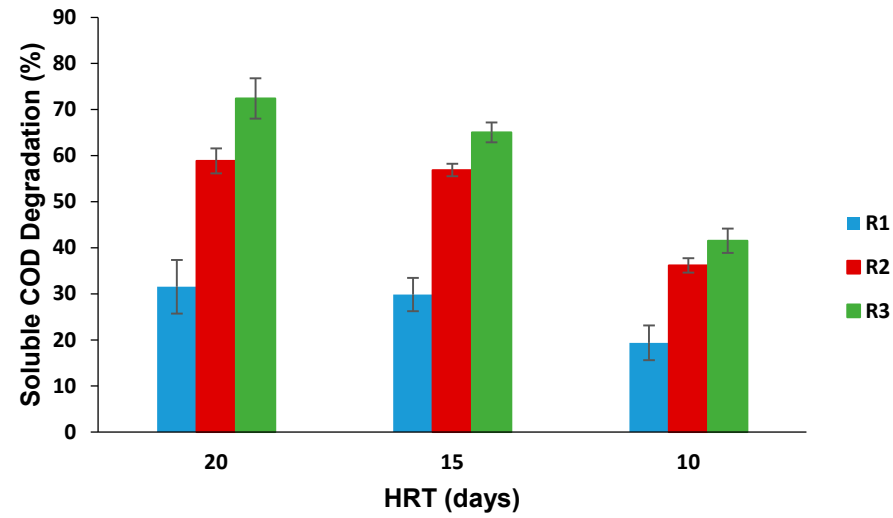

**Figure S1:** Values at steady state of sCOD degradation for the R1 (control), R2 (thermal pre-treatment) and R3 (micro-aerobic pre-treatment) digesters at 20, 15 and 10 days of HRT.

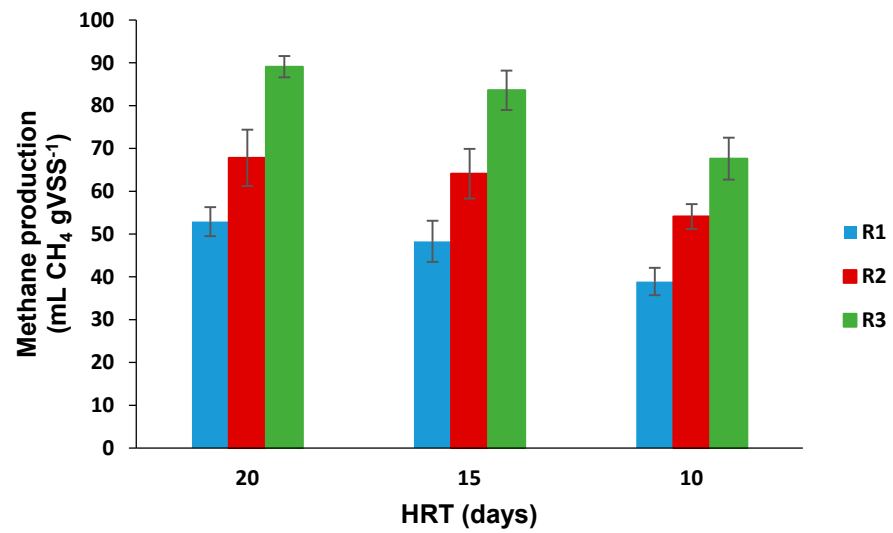

**Figure S2:** Average volume at steady state of methane production for the R1 (control), R2 (thermal pre-treatment), and R3 (micro-aerobic pre-treatment) digesters at 20, 15 and 10 days of HRT.
